1 **Title: Long-term community change through multiple rapid transitions in a desert rodent**  
2 **community**

3  
4  
5  
6

7 **Authors:**

8  
9

10 *Corresponding author:*

11 Erica M. Christensen, Department of Wildlife Ecology and Conservation, University of Florida,  
12 ericachristensen@ufl.edu

13

14 David J. Harris, Department of Wildlife Ecology and Conservation, University of Florida,  
15 dave@harris-research.me

16

17 S. K. Morgan Ernest, Department of Wildlife Ecology and Conservation, University of Florida,  
18 skmorgane@ufl.edu

19

## 20 **Abstract**

21 While studies increasingly document long-term change in community composition, whether  
22 long-term change occurs gradually or via rapid reorganization events remains unclear. We used  
23 Latent Dirichlet Allocation (LDA) and a change-point model to examine the long-term dynamics  
24 of a desert rodent community undergoing compositional change over a 38-year span. Our  
25 approach detected three rapid reorganization events, where changes in the relative abundances of  
26 dominant and rare species occurred, and a separate period of increased variance in the structure  
27 of the community. These events coincided with time periods—possibly related to climate  
28 events—where the total abundance of rodents was extremely low. There are a variety of  
29 processes that could link low abundance events with a higher probability of rapid ecological  
30 transitions, including higher importance of stochastic processes (i.e., competitive interactions or  
31 priority effects) and the removal of structuring effects of competitive dominants or incumbent  
32 species. Continued study of the dynamics of community change will provide important  
33 information not only on the processes structuring communities, but will also provide guidance  
34 for forecasting how communities will undergo change in the future.

35

36 **Key words:** community dynamics, Latent Dirichlet Allocation, desert rodents, temporal  
37 dynamics, extreme climatic events

38

## 39 **Introduction**

40 As humans alter the template of nature by increasing temperature, changing nutrient  
41 distributions, and altering land cover (Walther 2010), the composition of species living in these  
42 places also changes. Compositional changes occur both directly as each species responds to the

43 environment in the context of its own needs or preferences, and indirectly through changes in the  
44 competitive landscape and other species interactions. Depending on the mechanisms driving  
45 community change, this change can be gradual or rapid. Gradual change can occur through  
46 stochastic turnover events, or niche-based turnover as species' ability to thrive gradually  
47 improves or degrades as the environment changes (e.g. Tingley et al. 2009). Rapid changes in  
48 communities can emerge as ecosystems respond to intrinsic or extrinsic drivers (Williams et al.  
49 2011). With intrinsically-driven rapid change, sometimes referred to as regime shifts, gradual  
50 changes in the environment eventually push the ecosystem past a threshold, triggering rapid  
51 shifts to an alternate stable state (Scheffer and Carpenter 2003). Extrinsically-driven rapid  
52 changes can occur either from niche-based tracking as the environment rapidly shifts from one  
53 state to another (Beaugrand 2004), or via extreme events, which cause cascading changes in  
54 species populations that alter how the community recovers post-disturbance (Smith 2011).

55         While a growing number of studies document the occurrence of rapid ecological  
56 transitions (Beaugrand 2004, Thibault and Brown 2008), meta-analyses compiling data from  
57 many long-term studies indicate that most communities are changing gradually over time (La  
58 Sorte and Boecklen 2005, Dornelas et al. 2014). This discrepancy may arise because studies  
59 focused on rapid ecological transitions are asking different questions than meta-analyses  
60 examining community change. Because these events are unpredictable and abrupt, studies of  
61 rapid ecological transitions typically focus on relatively short time-scales and include only the  
62 dynamics immediately before and after the specific event being studied (e.g. Thibault and Brown  
63 2008). In contrast, meta-analyses of community change focus on the trends occurring over  
64 decades and may intentionally average out or avoid periods of rapid transition. Because studies  
65 of rapid ecological transitions and meta-analyses are focused on different patterns at different

66 time scales, it is unknown whether rapid ecological transitions are truly rare events. Answering  
67 this question requires high frequency, long-term monitoring data and methods that are able to  
68 detect these dynamics in ecological time series.

69 Here, we examine community change through time in a desert rodent community.  
70 Surveyed monthly from 1977 to 2015, this rodent community has undergone significant  
71 turnover. Both rapid and gradual reorganization have been invoked to explain these changes in  
72 rodent composition. Using linear approaches typically used in meta-analyses and applied to  
73 annual or seasonal data, rodent species turnover was interpreted as indicative of gradual long-  
74 term response to habitat shifts from open arid grassland to shrubland (Ernest et al. 2008). Other  
75 studies, focused on the impacts of specific climate events on the rodent community, have  
76 proposed that these events triggered rapid shifts in community composition (Valone et al. 1995,  
77 Thibault and Brown 2008). Thus this is an ideal data set for assessing how to reconcile short-  
78 term events with long-term community change at the multi-decade scale.

79

## 80 **Methods**

81 To examine the dynamics of this community, we used 38 years of monthly rodent data  
82 from the Portal Project, a long-term study located on 20 hectares of Chihuahuan Desert near the  
83 town of Portal, Arizona, USA. This site has undergone considerable habitat change: a 3-fold  
84 increase in woody vegetation between 1977 and the mid-1990s transitioned this site from an  
85 open desertified grassland with widely scattered woody shrubs to a desert shrubland (Brown et  
86 al. 1997). Small mammal data is collected at this site on 24 permanent 50m by 50m plots,  
87 sampled at monthly intervals with no major changes in methodology since 1977. Here, we pool  
88 data from the 8 unmanipulated (“control”) plots, which allow unrestricted access to all species

89 from the regional pool, to provide one site-level estimate of the natural dynamics of the rodent  
90 community from 1977-2015. Data for our analysis consisted of a table of counts for each species  
91 for each month of the time series. This amounted to 436 time steps and 21 species.

92 The twenty-one rodent species caught at the site consist primarily of granivorous rodents,  
93 with some insectivorous or folivorous species. The body size range of this community spans  
94 from 6 grams to nearly 200 grams. This community has experienced considerable turnover in  
95 species composition through time, with only two species captured consistently at almost every  
96 survey since 1977. Further information on the site and protocol can be found in Brown (1998)  
97 and Ernest et al. (2016). The latter paper also contains the data used in this analysis.

98 To quantify the dynamics of species composition, we used a 2-step approach. First, we  
99 reduced the dimensionality of composition data (i.e. condensed the species-level information on  
100 presence/absence and abundances) using a method from machine learning (Latent Dirichlet  
101 Allocation; see Blei et al. 2003) that is capable of detecting subtle or abrupt changes in  
102 composition. We then quantified the dynamics of this simplified composition time series using a  
103 change-point model (Western and Kleykamp 2004). We demonstrate the 2-step approach with a  
104 set of simulated data in Appendix S1.

105

#### 106 *Identifying species associations using Latent Dirichlet Allocation*

107 Latent Dirichlet Allocation (LDA) was developed as an alternative to cluster analysis for  
108 summarizing documents based on the words they contain. This machine learning approach was  
109 recently introduced to ecology as a way to quantify changes in species composition across  
110 gradients (see Valle et al. 2014). LDA takes the words in a document and identifies “topics” –  
111 collections of words that tend to be found together in specific proportions (Blei et al. 2003).

112 Whereas clustering approaches assign each sample (“document”) to exactly one cluster, LDA  
113 attempts to infer the relative contributions of all topics. If these contributions change gradually  
114 over time, then these changes in document composition can be tracked from sample to sample.  
115 When applied to ecological data, this technique can summarize community observations  
116 (“documents”) based on the species (“words”) they contain. Analogous to collections of words  
117 forming topics in document analysis, LDA identifies groups of species that tend to be found  
118 together in specific proportions. Rather than looking at raw species composition in a collection  
119 of community observations (for example over a gradient in space or time), LDA is able to: 1)  
120 reduce species composition at each sampling point to its community-type composition, and 2)  
121 describe each community-type in terms of the species it contains, which may reveal important  
122 information about underlying species associations.

123 Fitting an LDA model involves simultaneously determining two sets of numbers: one  
124 defining the community-types, and one describing the observed species assemblages in terms of  
125 those types. Due to the complex relationship between the way each community-type is defined  
126 and its influence on individual assemblages, exact inference is not possible in this model. We  
127 used Blei et al.’s variational approximation, which simplifies this relationship. This  
128 approximation allowed us to use Blei et al.’s (2003) iterative “variational expectation-  
129 maximization” procedure for jointly optimizing both sets of parameters, as implemented in the  
130 ``topicmodels`` package (version 0.2-7) (Hornik and Grün 2011) for R 3.3.2 (R Core Team 2016).  
131 Like many clustering and ordination methods, LDA requires the number of community-types to  
132 be specified as model input (it does not determine the number of community-types supported by  
133 the data). We used an approximate AIC procedure (based on a variational approximation to the  
134 full likelihood function) to inform the appropriate number of community-types needed to best

135 describe the data (Appendix S2: Fig. S1). See Valle et al. 2014 for a thorough description of  
136 LDA in an ecological context, and comparison of LDA to traditional clustering techniques.

137

138 *Quantifying when change occurs using a change-point model*

139 LDA is a discovery tool which simplifies multivariate species composition to better  
140 visualize community dynamics. However, it does not tell us if (or when) a change in community  
141 structure has occurred. We fit a change-point model (Western and Kleykamp 2004) to identify  
142 abrupt transitions in the time series of community-types generated by the LDA model. Change-  
143 point models break up a time series into intervals, with a different set of parameters to describe  
144 the time series during each interval. Between each pair of change-points, we modeled each  
145 community-type's prevalence as a sinusoid with a period of one year, to control for seasonal  
146 fluctuations. The community-type proportions in each interval were modeled using a separate  
147 multinomial generalized linear model fit with the nnet package (Venables and Ripley 2002).  
148 Because we were modeling proportions rather than counts, this model gave us a *quasi*-likelihood  
149 for each interval, rather than a conventional likelihood (McCullagh and Nelder 1989). Since our  
150 quasi-likelihoods did not inflate the variance, however, they can be interpreted on the same scale  
151 as a conventional likelihood for purposes of model comparison (Anderson et al. 1994). The  
152 product of interval-level quasi-likelihoods yields the quasi-likelihood for the full data set; this  
153 value will be largest when the change-points break the time series into relatively stable intervals  
154 that can be explained well by the generalized linear model.

155 The number of possible change-point locations was too large to evaluate all the  
156 possibilities exhaustively, so we used Markov chain Monte Carlo (MCMC) to collect a  
157 representative sample of change-point locations that are consistent with the data. Initial

158 experiments with Metropolis sampling showed poor mixing, so we implemented a parallel  
159 tempering sampler (also called Metropolis-coupled MCMC and replica-exchange MCMC) to  
160 facilitate movement of the Markov chain between modes via exchanges with auxiliary Markov  
161 chains that rapidly explore the space of possible change-points (Earl and Deem 2005). We fit  
162 change-point models with up to five change-points for the rodent data, and evaluated model  
163 performance by comparing the average log-quasi-likelihood to the number of model parameters  
164 (Gelman et al. 2014).

165

## 166 **Results**

167 Rodent species composition over the 40 years of the study was best described using four  
168 different community-types (Appendix S2: Fig. S1, Table S1). Our four community-types share  
169 some species (though they differ in relative abundances), while other species are unique to one or  
170 two community-types (Fig. 1a). Our four community-types differ in which species are the most  
171 abundant. The most abundant members of community-types 1 and 2 are kangaroo rats from the  
172 genus *Dipodomys*: community-type 1 is co-dominated by *D. spectabilis* and *D. merriami*, while  
173 community-type 2 is dominated by *D. merriami* alone. In contrast, the most abundant members  
174 of community-types 3 and 4 are pocket mice from the genus *Chaetodipus*: community-type 3 is  
175 dominated by *C. baileyi* and community-type 4 by *C. penicillatus*. In Fig. 1a, the 21 species are  
176 arranged on the x-axes in order of decreasing body size and grassland-affiliated species are  
177 denoted with bold outlines on their bars, to demonstrate that the four community-types differ not  
178 only in the identity of species making up the community, but also the distribution of body sizes  
179 (Ernest 2013) and habitat preferences contained in the community.

180 Through time, the different community-types varied in their prevalence and dynamics



181 (Fig. 1b). When the study began, the desert rodent community mainly consisted of community-  
182 type 1 (Fig. 1, light blue). In the mid-1980s, the rodent community transitioned to community-  
183 type 2 (Fig. 1, dark blue) and then transitioned again in the late 1990s to become a mix of  
184 community-types 2, 3, and 4 (Fig. 1, dark blue, gold, and grey, respectively). Finally, around  
185 2010, the community entered its current state which is seasonal oscillations between community-  
186 types 2 and 4 (Fig. 1, dark blue and grey). These dynamics and community-types are consistent  
187 with previous studies that documented the decline of *D. spectabilis* (the co-dominant species of  
188 community-type 1) in the mid-1980s (Valone et al. 1995), the colonization and rise to dominance  
189 of *C. baileyi* (the dominant species in community-type 3) in the late-1990s (Ernest and Brown  
190 2001), shifts in the body size structure of the community from large species to smaller species  
191 (White et al. 2004), and a general decline in grassland-affiliated species and an increase in  
192 shrubland-affiliated species (Ernest et al. 2008).

193 Visually, the LDA results suggest that major shifts in community dynamics occurred  
194 multiple times over the study. Using our change-point approach, we found that a model  
195 containing four change-points was best supported by the data (for comparison of models  
196 containing 2, 3, 4, and 5 change-points see Appendix S2: Fig. S2). Histograms showing the  
197 locations of these four change-points are shown in Fig. 2c, with the distribution of each point  
198 shown in a different shade of gray. Using these distributions, we located the 95% credible  
199 interval for when each of these transitions occurred: December 1983-July 1984, October 1988-  
200 January 1996, September 1998-December 1999, and June 2009-September 2010. Fig. 1d shows  
201 the change-point model's estimate of how the prevalence of the four community-types differs  
202 before and after each transition event, demonstrating that three of these events (1984, 1998-1999,  
203 2009-2010) are driven by a shift in which community-type is most prevalent, marking a major

204 shift in community structure.

205           The 1988-1996 transition differs from the other three major reorganization events. It has  
206 a broader change-point distribution, and there is no change in which community-type is  
207 dominant. However, this change-point indicates an increase in the variance (amplitude) of the  
208 dominant community-type through this period. Minor changes in community structure also occur  
209 as community-type 1 disappears and community-types 3 and 4 increase in prevalence. Together  
210 these dynamics suggest the 1988-1996 transition is not a rapid shift in community structure like  
211 the other events, but is instead either an increase in the variance of community structure and/or a  
212 signal of a very slow shift in species composition that was abruptly terminated with the major  
213 reorganization event of 1998-1999. We also repeated analyses with three, five and six  
214 community-types in case our results were highly sensitive to the number of community-types  
215 specified, and qualitatively, the results we discuss are generally robust (see Appendix S2: Fig.  
216 S3, Fig. S4, Fig. S5 for comparison).

217

## 218 **Discussion**

219           Over nearly 40 years, the rodent community at the Portal Project has changed  
220 substantively, with shifts in species composition, dominance structure, and distributions of body  
221 sizes and habitat affiliations (Fig. 1). Our results are consistent with earlier studies which  
222 described the replacement of grassland-affiliated species by shrubland-affiliated species (Ernest  
223 et al. 2008); however our results indicate that this reorganization did not occur gradually but  
224 through relatively discrete events roughly every 10-15 years (Fig. 1). These rapid changes seem  
225 to be the primary dynamic explaining the shift at the site from a rodent community dominated by  
226 large-bodied grassland-affiliated species to a smaller-bodied shrubland-affiliated assemblage.

227 Given the shift in the assemblage from grassland- to shrubland-affiliated species, the primary  
228 driver of the change in our rodent community is most likely the increase in shrubs at the site.  
229 While we do not have high-frequency observations of this habitat change, shrub growth  
230 dynamics are known to be slow compared to the rapid change we observed in the rodent  
231 community (Goslee et al. 2003). While the rodent community did, in a broad sense, track this  
232 environmental change, it seems unlikely that changes in the rodent community occurred in sync  
233 with changes in habitat. The step-wise changes in the rodent community suggest that shifts in  
234 which niche traits are favored by the environment as habitat shifts is only part of the story.

235         When we examine the timing of the rapid transitions, there is a coincidence between the  
236 location of the change-point distributions and low abundance periods for the rodents (Fig. 2). Not  
237 all low abundance events are associated with rapid shifts in composition, but all rapid transitions  
238 in composition are associated with low abundance events. The abundance of an entire  
239 community can drop for a variety of reasons (e.g., low resource availability, disturbances,  
240 disease, or predation events) and we do not have the data to examine all possibilities. However,  
241 some indirect evidence suggests that low resources and disturbances may be contributing to the  
242 occurrence of low abundance events in our system. As in many ecosystems, our ecosystem  
243 experiences both periodic droughts and extreme rainfall events. Droughts reduce resource  
244 availability in this water-limited system, and extreme rainfall events can cause sheet flooding  
245 (Thibault and Brown 2008) or saturate soils and damage food stores for granivorous rodents  
246 (Valone et al. 1995). All four of our detected change-points, including the longer transition in the  
247 1990s, overlap or occur adjacent to droughts or high rainfall events: 1) an intense tropical storm  
248 in October 1983 (Valone et al. 1995), 2) a drought in the 1990s (Allington et al. 2013; Appendix  
249 S2: Fig. S6), 3) a sheet flood during monsoon season in August 1999 (Thibault and Brown

250 2008), and 4) a period of low plant productivity in 2009 (Appendix S2: Fig. S6). However, it is  
251 important to note that not all droughts and high rainfall events in this system are associated with  
252 low abundance events. For example, low plant productivity also occurred in 2003 (Appendix S2:  
253 Fig. S6), but neither abnormally low abundances nor a transition in community composition  
254 occurred during that time. If climate events are driving low abundance and rapid ecological  
255 transitions, then their impact on the rodent community must also depend on other factors that  
256 mitigate those effects.

257         Regardless of the drivers, there are a variety of processes that could cause a community  
258 experiencing low abundance to have an increased likelihood of a rapid ecological transition. Low  
259 abundances may occur because the dominant species has been hit disproportionately hard – as  
260 happened in our 1983 transition event when the dominant species *D. spectabilis* experienced a  
261 population crash (Valone et al. 1995). Removing or reducing dominant species can restructure  
262 communities (e.g. Sasaki and Lauenroth 2011) by providing niche opportunities to other species  
263 (Shea and Chesson 2002). Alternatively, events that reduce all species to low abundance may  
264 increase the role of stochasticity in determining competitive outcomes and can result in the  
265 establishment of alternative community compositions (Orrock and Fletcher 2005). Low  
266 community abundance also creates opportunities for colonization. Stochasticity in the order of  
267 colonization as a community recovers from low abundance can send community assembly down  
268 different trajectories (Fukami et al. 2010). Thus low abundance events may be critical junctures  
269 where a variety of forces may operate, either singly or in concert, to drive communities toward  
270 new assembly trajectories. The prevalence of stochastic processes when abundances are low may  
271 also explain why low abundance events do not always result in sudden ecological transitions –  
272 sometimes processes will align to create new compositions, but sometimes they will recreate the

273 previous community structure.

274           Given that our reorganization events appear to be tracking the shift in environment, it  
275 seems unlikely that stochastic processes alone explain why our community structure changes  
276 after low abundance events. One possibility is that processes similar to priority effects give an  
277 advantage to the previously established community, making reorganization in response to  
278 gradual changes in the environment more difficult. Through interference competition, inferior  
279 competitors can delay or prevent the colonization of a superior competitor if the inferior species  
280 is numerically dominant (Amarasekare 2002, Thibault and Brown 2008). As our environment  
281 shifted from grassland to shrubland, species that were competitively dominant in the grassland  
282 would have slowly become competitively inferior to species better suited to shrubland. However,  
283 through numerical superiority and interference competition (e.g. territoriality and seed caching,  
284 in our system), they may have impeded the establishment and growth of more superior  
285 competitors. Reductions in abundance would remove this ‘incumbent advantage’ by creating a  
286 clean slate where superior competitors can now dominate a community. While the ability of an  
287 established community to resist new colonists is well-documented in the context of invasive  
288 species (Corbin and D’Antonio 2004), its role in determining how communities track  
289 environmental change has received less attention (but see Thibault and Brown 2008). The  
290 ‘incumbent advantage’ may also explain why low abundance events do not always generate  
291 rapid transition events. If low abundances occur under conditions where the numerically  
292 dominant species is still competitively dominant, the community should simply reassemble to its  
293 pre-disturbance state. Only when there is a mismatch between which species is competitively  
294 dominant and which is numerically dominant do we expect rapid transitions after low abundance.

295           Our results show that long-term community change in our intensively studied rodent

296 community did not occur gradually. Although changes in rodent community composition appear  
297 to track changes in the environment at the multi-decadal scale, this community change occurred  
298 in discrete jumps. Further study to determine whether long-term change through discrete jumps  
299 is a common phenomenon or unique to this system is critical for understanding whether systems  
300 that appear stable today may be on the verge of rapid ecological transitions. However, rectifying  
301 long-term multidecadal scale changes with the short-term dynamics that create that change  
302 requires long-term, high frequency monitoring, emphasizing growing concerns (Hughes et al.  
303 2017) that maintaining long-term studies will be critical for detecting, understanding, and  
304 predicting future changes in nature.

305 **Figure 1**

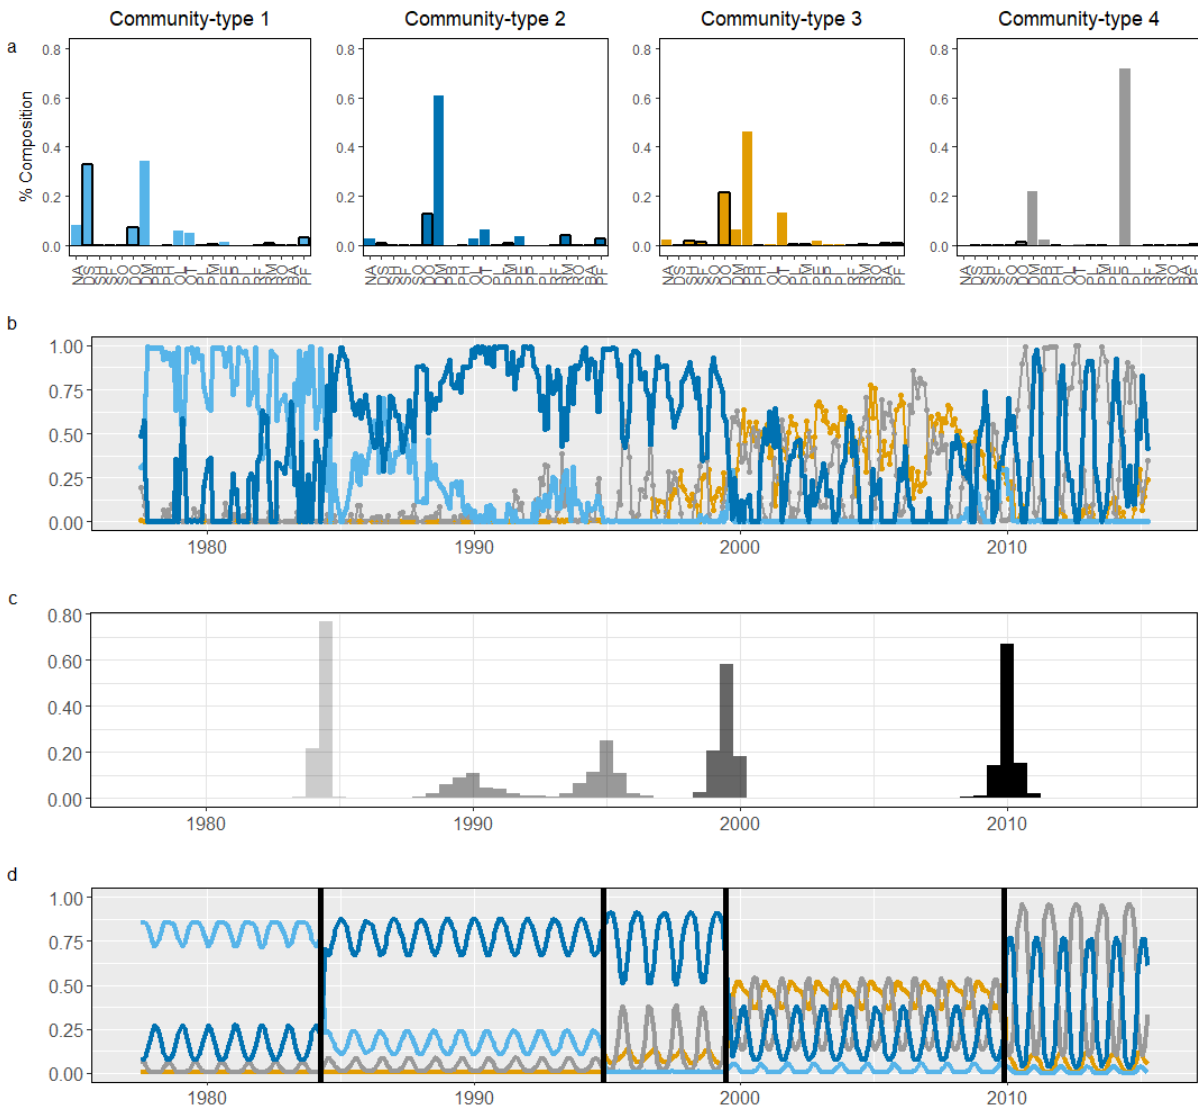

306  
 307 **Figure 1. a)** species composition of the four community-types produced by the LDA model, with  
 308 species arranged on the x-axes by decreasing body size, and grassland-affiliated species  
 309 emphasized by black boxes around the bars (see Appendix S2: Table S1); **b)** prevalence of the  
 310 four community-types over time as estimated by the LDA model; **c)** histograms of four change-  
 311 points representing the greatest changes in the prevalence of community-types from **b)**; and **d)** the  
 312 change-point model's estimate of how community-type prevalence changes before and after each  
 313 transition point. Species codes in panel a: NA = *Neotoma albigula*, DS = *Dipodomys spectabilis*,  
 314 SH = *Sigmodon hispidus*, SF = *Sigmodon fulviventer*, SO = *Sigmodon ochrognathus*, DO =  
 315 *Dipodomys ordii*, DM = *Dipodomys merriami*, PB = *Chaetodipus baileyi*, PH = *Chaetodipus*  
 316 *hispidus*, OL = *Onychomys leucogaster*, OT = *Onychomys torridus*, PL = *Peromyscus leucopus*,  
 317 PM = *Peromyscus maniculatus*, PE = *Peromyscus eremicus*, PP = *Chaetodipus penicillatus*, PI =  
 318 *Chaetodipus intermedius*, RF = *Reithrodontomys fulvescens*, RM = *Reithrodontomys megalotis*,  
 319 RO = *Reithrodontomys montanus*, BA = *Baiomys taylori*, PF = *Perognathus flavus*.

320 **Figure 2**

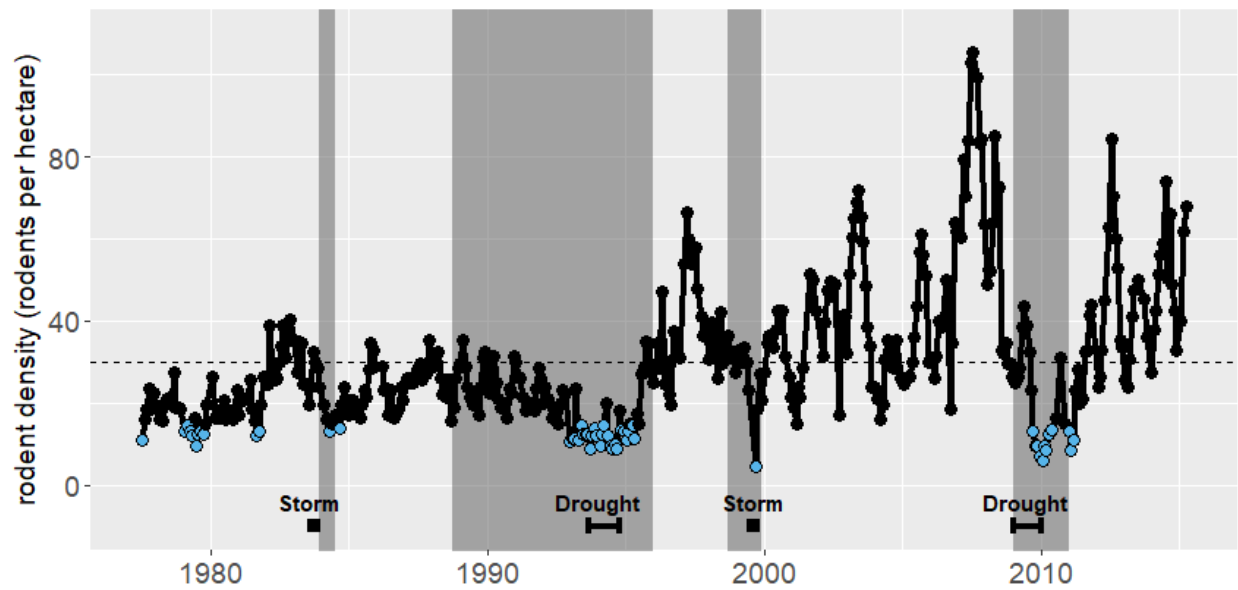

321 **Figure 2.** Total rodent abundance per hectare over time. Horizontal dotted line shows long-term  
322 mean. Grey vertical bars show the 95% confidence interval for each of the community transition  
323 events. Light blue dots are data points in the 0.15 quantile of the negative binomial  
324 fit to the data. Locations in time of the two droughts and two storm disturbance events are  
325 shown.  
326

327

328



329 **Acknowledgements**

330 This research was supported in part by the Gordon and Betty Moore Foundation's Data-Driven  
331 Discovery Initiative through Grant GBMF4563 to E.P. White. We would also like to thank D.  
332 Valle and E. Damschen for informative discussions on LDA and stochastic community  
333 assembly, respectively. The Portal Project has been funded nearly continuously by the National  
334 Science Foundation, most recently by DEB-1622425, which has also supported E. Christensen.

335

336 **References**

- 337 Allington, G.R.H., D.N. Koons, S.K.M. Ernest, M.R. Schutzenhofer, and T.J. Valone. 2013.  
338 Niche opportunities and invasion dynamics in a desert annual community. *Ecology Letters* **16**:  
339 158–166.
- 340 Amarasekare, P. 2002. Interference competition and species coexistence. *Proceedings of the*  
341 *Royal Society of London B: Biological Sciences* **269**:2541–2550.
- 342 Anderson, D.R., K.P. Burnham, and G.C. White. 1994. AIC Model Selection in Overdispersed  
343 Capture-Recapture Data. *Ecology* **75**:1780-1793.
- 344 Beaugrand, G. 2004. The North Sea regime shift: Evidence, causes, mechanisms and  
345 consequences. *Progress in Oceanography* **60**:245–262.
- 346 Blei, D.M., A.Y. Ng, and M.I. Jordan. 2003. Latent Dirichlet Allocation. *Journal of Machine*  
347 *Learning Research* **3**:993–1022.
- 348 Brown, J. H. 1998. The desert granivory experiments at Portal. Pages 71-95 in W.J. Resetarits Jr.  
349 and J. Bernardo, editors. *Experimental Ecology*. Oxford University Press, New York, New  
350 York, USA.
- 351 Brown, J.H., T.J. Valone, and C.G. Curtin. 1997. Reorganization of an arid ecosystem in

- 352 response to recent climate change. *Proceedings of the National Academy of Sciences*  
353 **94**:9729–9733.
- 354 Corbin, J.D., and C.M. D’Antonio. 2004. Competition Between Native Perennial and Exotic  
355 Annual Grasses: Implications for an Historical Invasion. *Ecology* **85**:1273–1283.
- 356 Dornelas, M., et al. 2014. Assemblage Time Series Reveal Biodiversity Change but Not  
357 Systematic Loss. *Science* **344**: 296–299.
- 358 Earl, D.J., and M.W. Deem. 2005. Parallel tempering: Theory, applications, and new  
359 perspectives. *Physical Chemistry Chemical Physics* **7**:3910-3916.
- 360 Ernest, S.K.M. 2013. Using size distributions to understand the role of body size in mammalian  
361 community assembly. Pages 147-167 in F.A. Smith and S.K. Lyons, editors. *Animal Body*  
362 *Size: Linking Pattern and Process across Space, Time, and Taxonomic Group*. University of  
363 Chicago Press, Chicago, USA.
- 364 Ernest, S.K.M., and J.H. Brown. 2001. Delayed Compensation for Missing Keystone Species by  
365 Colonization. *Science* **292**:101–104.
- 366 Ernest, S.K.M., J.H. Brown, K.M. Thibault, E.P. White, and J.R. Goheen. 2008. Zero Sum, the  
367 Niche, and Metacommunities: Long-Term Dynamics of Community Assembly. *The*  
368 *American Naturalist* **172**:E257–E269.
- 369 Ernest, S.K.M., et al. 2016. Long-term monitoring and experimental manipulation of a  
370 Chihuahuan desert ecosystem near Portal, Arizona (1977–2013). *Ecology* **97**:1082. doi:  
371 10.1890/15-2115.1Fukami, T., et al. 2010. Assembly history dictates ecosystem functioning:  
372 evidence from wood decomposer communities. *Ecology Letters* **13**:675–684.
- 373 Gelman, A., J. Hwang, and A. Vehtari. 2014. Understanding predictive information criteria for  
374 Bayesian models. *Statistics and Computing* **24**:997–1016.

- 375 Goslee, S.C., K.M. Havstad, D.P.C. Peters, A. Rango, and W.H. Schlesinger. 2003. High-  
376 resolution images reveal rate and pattern of shrub encroachment over six decades in New  
377 Mexico, U.S.A. *Journal of Arid Environments* **54**:755–767.
- 378 Hornik, K., and B. Grün. 2011. topicmodels: An R Package for Fitting Topic Models. *Journal of*  
379 *Statistical Software* **40**:1–30.
- 380 Hughes, B.B., et al. 2017. Long-Term Studies Contribute Disproportionately to Ecology and  
381 Policy. *BioScience* **67**:271–281.
- 382 La Sorte, F.A., and W.J. Boecklen. 2005. Temporal turnover of common species in avian  
383 assemblages in North America. *Journal of Biogeography* **32**:1151–1160.
- 384 McCullagh, P. and J.A. Nelder. 1989. *Generalized Linear Models: Monographs on Statistics and*  
385 *Applied Probability*. 2nd edition. Chapman & Hall. London, UK. pp. 328
- 386 Orrock, J.L., and R.J. Fletcher Jr. 2005. Changes in Community Size Affect the Outcome of  
387 Competition. *The American Naturalist* **166**:107–111.
- 388 R Core Team. 2016. *R: A language and environment for statistical computing*. R Foundation for  
389 statistical Computing, Vienna, Austria. <https://www.R-project.org/>
- 390 Sasaki, T., and W.K. Lauenroth. 2011. Dominant species, rather than diversity, regulates  
391 temporal stability of plant communities. *Oecologia* **166**:761–768.
- 392 Scheffer, M., and S.R. Carpenter. 2003. Catastrophic regime shifts in ecosystems: linking theory  
393 to observation. *Trends in Ecology & Evolution* **18**:648–656.
- 394 Shea, K., and P. Chesson. 2002. Community ecology theory as a framework for biological  
395 invasions. *Trends Ecology & Evolution* **17**:170–176.
- 396 Smith, M.D. 2011. An ecological perspective on extreme climatic events: a synthetic definition  
397 and framework to guide future research. *Journal of Ecology* **99**:656–663.

- 398 Thibault, K.M., and J.H. Brown. 2008. Impact of an extreme climatic event on community  
399 assembly. *Proceedings of the National Academy of Sciences* **105**:3410–3415.
- 400 Tingley, M.W., W.B. Monahan, S.R. Beissinger, and C. Moritz. 2009. Birds track their  
401 Grinnellian niche through a century of climate change. *Proceedings of the National Academy  
402 of Sciences* **106**:19637–19643.
- 403 Valle, D., B. Baiser, C.W. Woodall, and R. Chazdon. 2014. Decomposing biodiversity data using  
404 the Latent Dirichlet Allocation model, a probabilistic multivariate statistical method. *Ecology  
405 Letters* **17**:1591–1601.
- 406 Valone, T.J., J.H. Brown, and C.L. Jacobi. 1995. Catastrophic Decline of a Desert Rodent,  
407 *Dipodomys spectabilis*: Insights from a Long-Term Study. *Journal of Mammalogy* **76**:428–  
408 436.
- 409 Venables, W.N, and B.D. Ripley. 2002. *Modern Applied Statistics with S*. Fourth Edition.  
410 Springer, New York, New York. pp. 199-206.
- 411 Walther, G.-R. 2010. Community and ecosystem responses to recent climate change.  
412 *Philosophical Transactions of the Royal Society of London B: Biological Sciences* **365**:2019–  
413 2024.
- 414 Western, B., and M. Kleykamp. 2004. A Bayesian Change Point Model for Historical Time  
415 Series Analysis. *Political Analysis* **12**:354-374.
- 416 White, E.P., S.K.M. Ernest, and K.M. Thibault. 2004. Trade-offs in Community Properties  
417 through Time in a Desert Rodent Community. *The American Naturalist* **164**:670–676.
- 418 Williams, J.W., J.L. Blois, and B.N. Shuman. 2011. Extrinsic and intrinsic forcing of abrupt  
419 ecological change: case studies from the late Quaternary. *Journal of Ecology* **99**:664–677.
- 420

421 **Appendix S1:** Supplementary explanation of methods, and demonstration using a simulated data  
422 set

423 LDA is easiest to understand as a generative model, moving from the top of Figure S1 to  
424 the bottom. LDA postulates that species assemblages are composed of random samples from a  
425 relatively small number of community-types, which are defined in terms of relative species  
426 composition (Fig. S1A). In this context, community-types (referred to as “topics” in most of the  
427 LDA literature), could represent guilds, clades, or other groups of species whose abundances  
428 tend to rise and fall together. Assemblages (Fig. S1C) are generated by randomly drawing  
429 species from each of these community-types, with the relative frequency of each community-  
430 type determined by the proportions in Fig. S1B.

431 Fitting an LDA model thus involves simultaneously determining two sets of numbers:  
432 one defining the community-types (Fig. S1A), and one describing the observed species  
433 assemblages in terms of those types (Fig. S1B). This requires working backwards from observed  
434 patterns to infer the parameters of a possible underlying process – i.e., moving in Figure 3 from  
435 panel D up to panels A and B

436 We simulated the simple scenario of two community-types containing overlapping sets of  
437 species, but with different permutations of species’ relative abundances (Fig. S2a). Using these  
438 two community-types, we simulated three types of dynamics: 1) a fast transition from one  
439 community-type to the other (Fig. S2b), 2) a slow transition (Fig. S2c), and 3) constant  
440 proportions of the two community-types over time (Fig. S2d). Applied to the simulated data, the  
441 LDA model reproduced the composition of the two simulated community-types (Fig. S2e,f) and  
442 the dynamics of the fast and slow change scenarios (Fig. S2h,i). The model failed to reproduce  
443 the simulated data when the two community-types were represented by constant proportions over  
444 time (Fig. S2g,j). This illustrates a limitation of the LDA approach: if there is no change in  
445 dominance from one community-type to another (i.e. “stable” community configuration over  
446 time), the algorithm will have difficulty distinguishing the two community-types.

447 When change is fast, the change point model identifies a narrow range of times as the  
448 likely location of the shift from one community type to another (Fig. S2k). When change is slow,  
449 it is less certain where this shift occurs and the distribution of change-point locations is wider  
450 (Fig. S2l). A uniform distribution emerged when no change occurred (Fig. S2m).

451

452 **Figure S1.** Graphical representation of the LDA model. **A.** Community-type definitions: the  
 453 relative species composition of each community-type; **B.** Community-type proportions: the  
 454 relative frequency of each community-type contributing to assemblages; **C.** Assemblages:  
 455 generated by randomly drawing species from the community-type pools in A according to the  
 456 proportions in B; **D.** Species composition of assemblages, as would be seen in actual community  
 457 data.  
 458

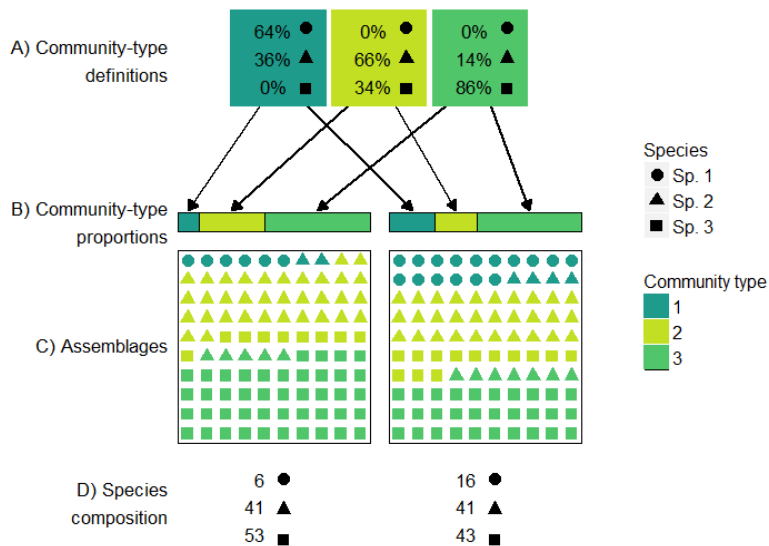

459

460 **Figure S2.** Demonstrating LDA and change-point model using simulated data. **a)** species  
 461 composition of two community-types to be simulated; **b)** simulation of rapid transition from  
 462 community-type 1 to community-type 2; **c)** simulation of gradual transition from community-  
 463 type 1 to community-type 2; **d)** simulation of unchanging community dynamics; **e-g)** species  
 464 composition of two community-types as output from the LDA model; **h-j)** output of LDA model,  
 465 trying to recover dynamics simulated in panel b-d; **k-m)** histograms showing the distribution of  
 466 estimated change-point location.  
 467

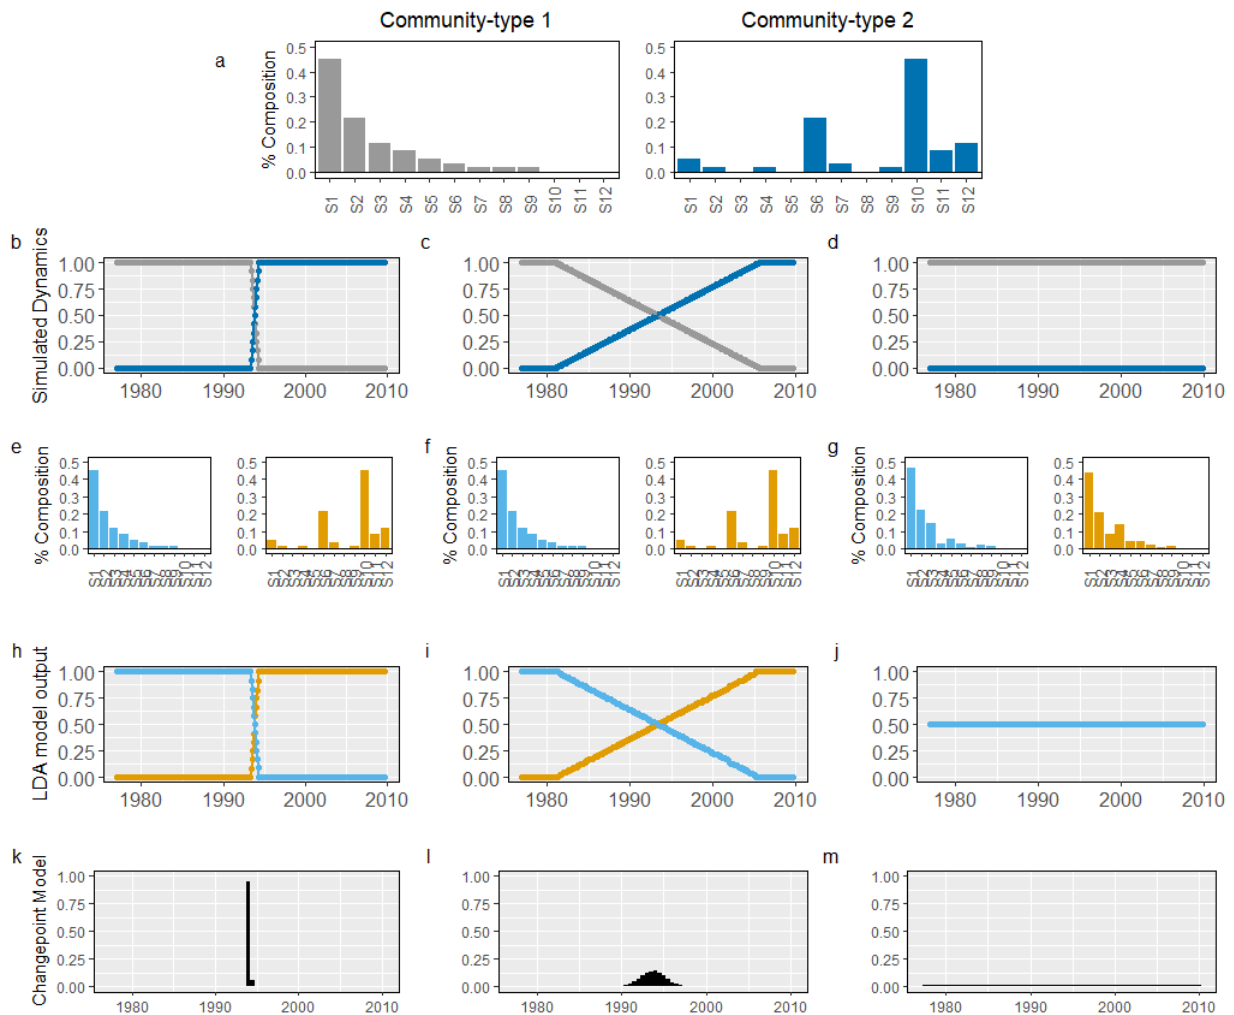

469 **Appendix S2: supplemental figures and tables**

470

471 **Table S1.** Species relative abundances in four community-types estimated by LDA model

472 **Figure S1.** Histogram of “best” number of community-types as estimated using 200 random  
473 seeds

474 **Figure S2.** Comparison of change-point models fit with 2, 3, 4, or 5 change-points.

475 **Figure S3.** Results of LDA model fit with three community-types

476 **Figure S4.** Results of LDA model fit with four community-types

477 **Figure S5.** Results of LDA model fit with five community-types

478 **Figure S6.** Normalized Difference Vegetation Index (NDVI) yearly average for 1984-2015.

479



480 **Table S1:** species relative abundances in the four community-types estimated by the LDA  
 481 model. Species codes: NA = *Neotoma albigula*, DS = *Dipodomys spectabilis*, SH = *Sigmodon*  
 482 *hispidus*, SF = *Sigmodon fulviventer*, SO = *Sigmodon ochrognathus*, DO = *Dipodomys ordii*, DM  
 483 = *Dipodomys merriami*, PB = *Chaetodipus baileyi*, PH = *Chaetodipus hispidus*, OL =  
 484 *Onychomys leucogaster*, OT = *Onychomys torridus*, PL = *Peromyscus leucopus*, PM =  
 485 *Peromyscus maniculatus*, PE = *Peromyscus eremicus*, PP = *Chaetodipus penicillatus*, PI =  
 486 *Chaetodipus intermedius*, RF = *Reithrodontomys fulvescens*, RM = *Reithrodontomys megalotis*,  
 487 RO = *Reithrodontomys montanus*, BA = *Baiomys taylori*, PF = *Perognathus flavus*.

|    | Community-type<br>1 | Community-type<br>2 | Community-type<br>3 | Community-type<br>4 |
|----|---------------------|---------------------|---------------------|---------------------|
| NA | 0.088               | 0.025               | 0.024               | 0.001               |
| DS | 0.340               | 0.000               | 0.000               | 0.000               |
| SH | 0.001               | 0.004               | 0.020               | 0.000               |
| SF | 0.000               | 0.003               | 0.014               | 0.000               |
| SO | 0.000               | 0.001               | 0.000               | 0.000               |
| DO | 0.076               | 0.128               | 0.211               | 0.018               |
| DM | 0.341               | 0.606               | 0.078               | 0.216               |
| PB | 0.000               | 0.000               | 0.450               | 0.025               |
| PH | 0.000               | 0.001               | 0.000               | 0.000               |
| OL | 0.061               | 0.030               | 0.003               | 0.001               |
| OT | 0.051               | 0.064               | 0.130               | 0.006               |
| PL | 0.000               | 0.000               | 0.004               | 0.000               |
| PM | 0.000               | 0.012               | 0.006               | 0.000               |
| PE | 0.011               | 0.041               | 0.016               | 0.000               |
| PP | 0.000               | 0.000               | 0.022               | 0.722               |
| PI | 0.000               | 0.000               | 0.006               | 0.002               |
| RF | 0.000               | 0.001               | 0.000               | 0.000               |
| RM | 0.000               | 0.049               | 0.000               | 0.000               |
| RO | 0.000               | 0.001               | 0.000               | 0.000               |
| BA | 0.000               | 0.001               | 0.009               | 0.002               |
| PF | 0.030               | 0.032               | 0.007               | 0.006               |

489 **Figure S1.** We estimated model fit using an approximate AIC procedure for LDA models using  
490 2 to 9 community-types. Since LDA depends on a random seed, we repeated the LDA model fit  
491 and AIC model selection using 200 different seeds to obtain a distribution of “best number of  
492 community-types.” This procedure always selected between 3 and 5 community-types, with 4  
493 selected by the majority of runs.

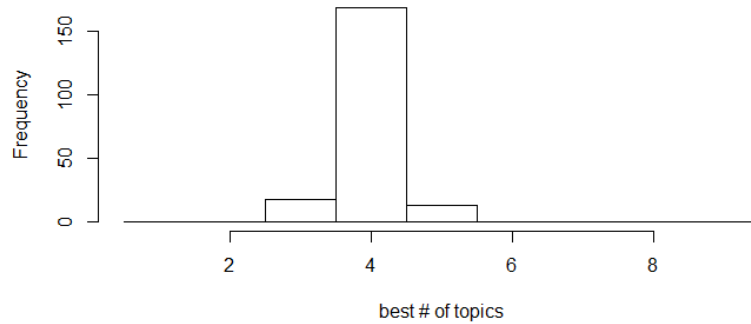

494

495 **Figure S2.** Comparison of change-point models fit with 2, 3, 4, or 5 change-points. The model  
496 containing 4 change-points was best supported.  
497

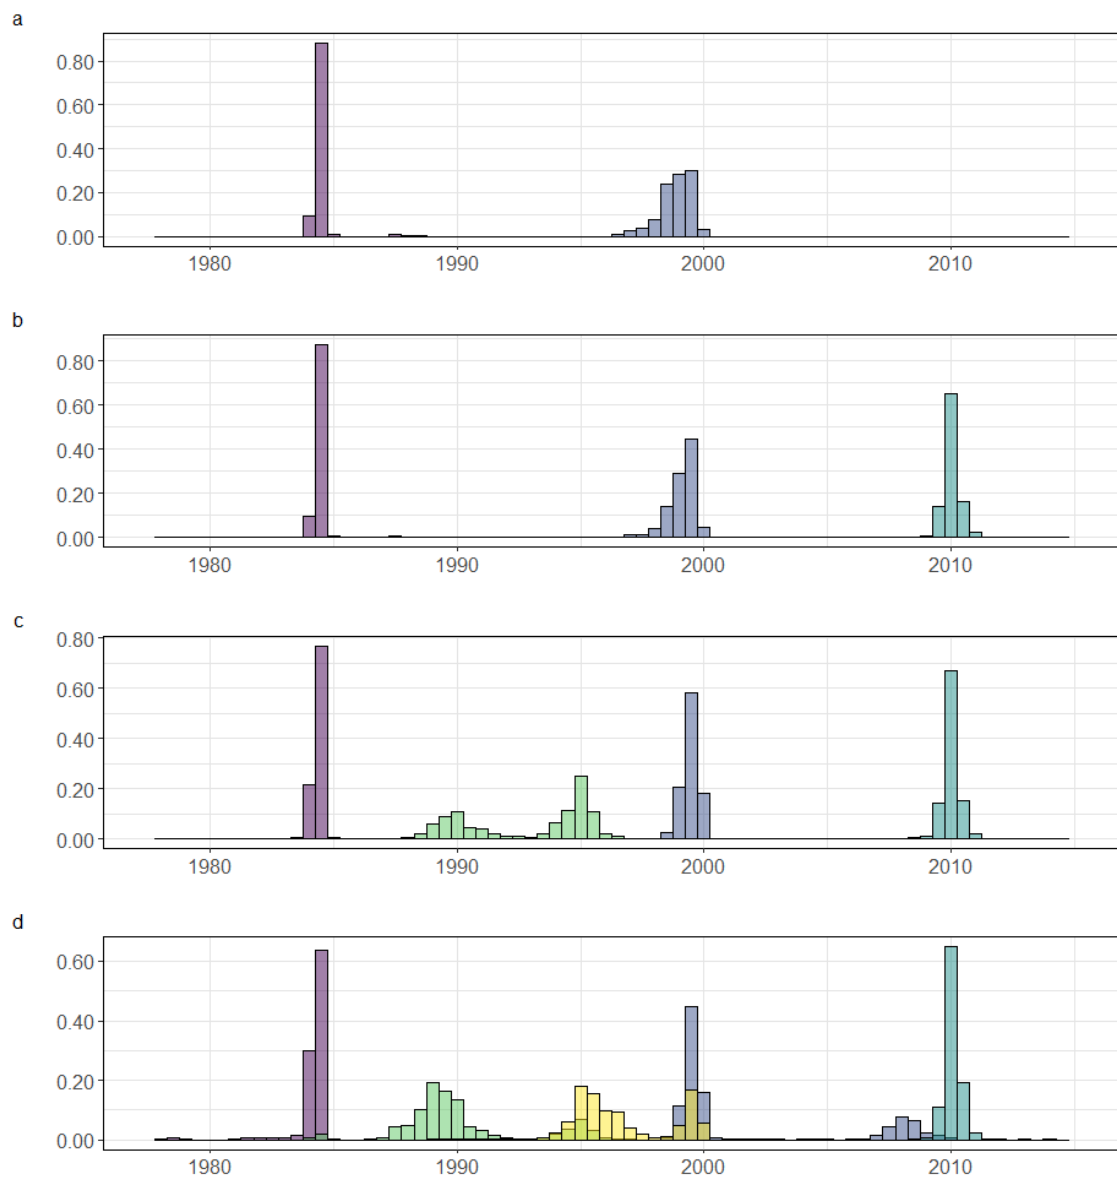

498

499 **Figure S3.** Results of LDA model fit with three community-types

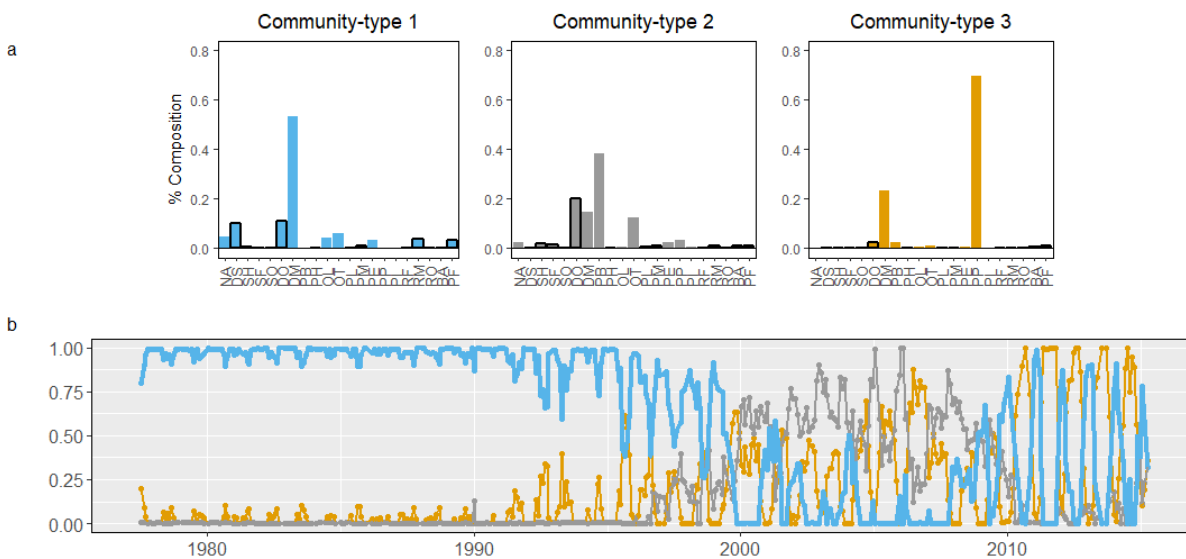

500  
501 **Figure S4.** Results of LDA model fit with four community-types  
502

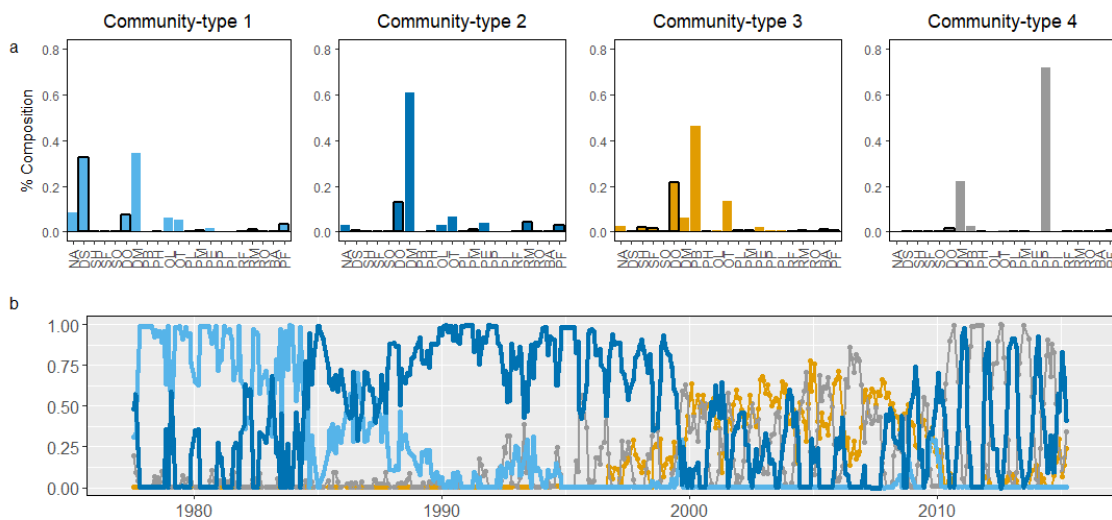

503

504 **Figure S5.** Results of LDA model fit with five community-types

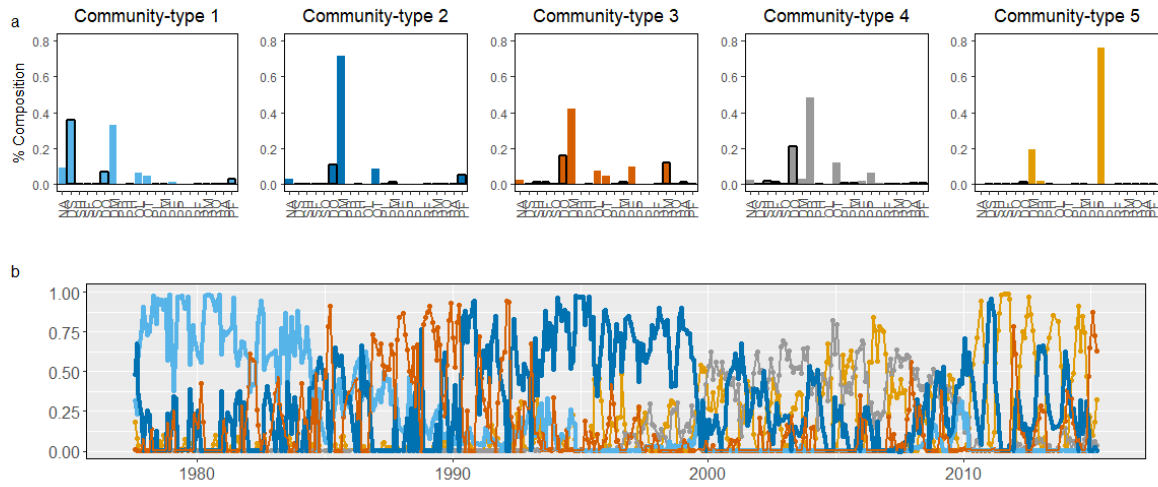

505

506 **Figure S6.** Normalized Difference Vegetation Index (NDVI) yearly average for 1984-2015.  
507 NDVI values were obtained from a combination of data from satellites Landsat 4, 5, 7, and 8.  
508 Raster NDVI files were downloaded from earthexplorer.usgs.gov and clipped to a 5 km<sup>2</sup> area  
509 centered over the Portal Project site. We calculated median NDVI value for each 5 km<sup>2</sup> image,  
510 and calculated correction factors based on the periods of overlap between satellites so data from  
511 all satellites could be directly compared. We calculated a time series of average yearly NDVI for  
512 each year for which there were at least 12 images spanning at least 6 months of the year.  
513

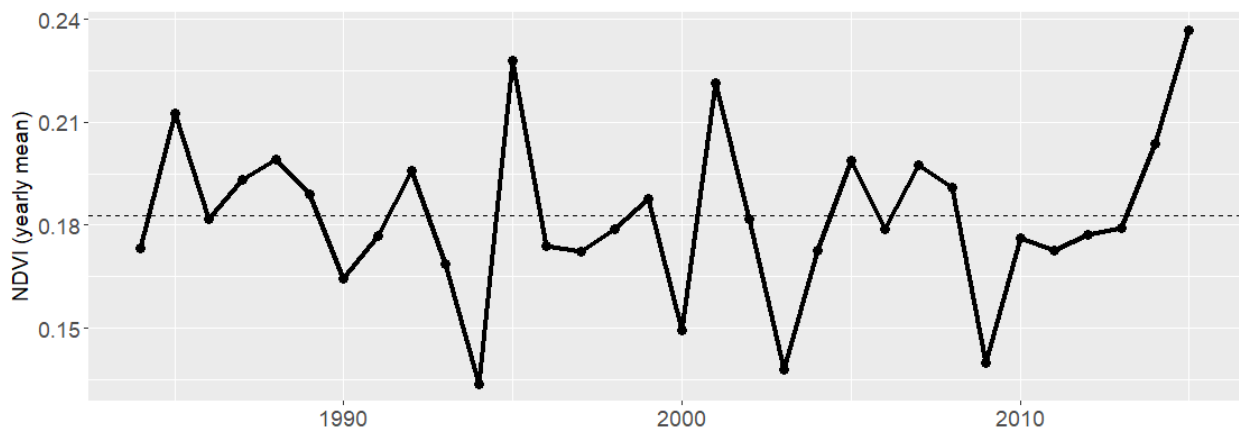

514
